# Supplementary material for: NeSSM: A Next-Generation Sequencing Simulator for Metagenomics
Source: PLoS One. 2013 Oct 4;8(10):e75448. doi: 10.1371/journal.pone.0075448 (PMC3790878; doi:10.1371/journal.pone.0075448)
Supplement: Table S7 — The community composition together with the abundance supplied by Morgan et al. and NeSSM. (XLSX) [file pone.0075448.s008.xlsx]

## Sheet: Sheet1
Table S7. The community composition of a real metagenome dataset (supplied by Morgan et al and NeSSM)
	Species	Abundance (Morgan et al)	Abundance (NeSSM)
	Acidothermus	13.66	14.009
	Halobacterium	1.19	0.908
	Lb.brevis	17.34	16.194
	Lb.casei	15.41	14.366
	Lc.lactis SK11	0.22	0.116
	Lc.lactis Il1403	4.42	4.62
	Myxococcus	27.58	29.319
	Pediococcus	0.27	0.253
	Saccharomyces	0.42	0.436
	shewanella	19.48	19.779
