# Supplementary material for: NeSSM: A Next-Generation Sequencing Simulator for Metagenomics
Source: PLoS One. 2013 Oct 4;8(10):e75448. doi: 10.1371/journal.pone.0075448 (PMC3790878; doi:10.1371/journal.pone.0075448)
Supplement: Table S9 — Comparison of assembly of NeSSM’s and existing tools’ (MetaSim, GemSIM and Grinder’s) simulation based on Dataset F. (XLSX) [file pone.0075448.s010.xlsx]

## Sheet: Sheet1
Table S9. Comparison of NeSSM and existing systems on Dataset F.
		Number(contig length>=100bps)	Max contig length(bps)	Average contig length(bps)	N50(bps)
	Dataset F	83628	26131	323	459
	NeSSM	77530	53469	336	468
	MetaSim	78837	12184	347	574
	GemSIM	74549	46796	393	773
	Grinder	74465	58173	397	797
		Number(contig length>=150bps)	Max contig length(bps)	Average contig length(bps)	N50(bps)
	Dataset F	52823	26131	440	588
	NeSSM	50915	53469	446	578
	MetaSim	48442	12184	489	767
	GemSIM	46733	46796	554	1088
	Grinder	46599	58173	561	1123
		Number(contig length>=200bps)	Max contig length(bps)	Average contig length(bps)	N50(bps)
	Dataset F	37011	26131	554	707
	NeSSM	36686	53469	551	685
	MetaSim	33720	12184	627	921
	GemSIM	32119	46796	728	1350
	Grinder	32321	58173	733	1391
		Number(contig length>=250bps)	Max contig length(bps)	Average contig length(bps)	N50(bps)
	Dataset F	27917	26131	663	815
	NeSSM	27713	53469	658	792
	MetaSim	25413	12184	759	1045
	GemSIM	23625	46796	910	1559
	Grinder	23777	58173	917	1614
